# Supplementary material
Source: MDPI journal article supplement (https://www.mdpi.com/2297-8739/10/8/456)
Supplement: s1 [file s1]

## Supplementary Information

Supplementary Table S1. Hydrophobicity index of protected amino acids.

| Amino acid | Hydrophobicity index (min) $\Delta t_{R(\text{peptide} - \text{Gly-peptide})}$ |            |            |            |            |            |
|------------|--------------------------------------------------------------------------------|------------|------------|------------|------------|------------|
|            | Sequence 1                                                                     | Sequence 2 | Sequence 3 | Sequence 4 | Sequence 5 | Sequence 6 |
| G          | 0.0                                                                            | 0.0        | 0.0        | 0.0        | 0.0        | 0.0        |
| H(Trt)     | 8.1                                                                            | 7.8        | 9.9        | 8.46       | 10.0       | 9.9        |
| Q(Trt)     | 11.0                                                                           | 10.9       | 12.7       | 11.38      | 12.9       | 12.7       |
| N(Trt)     | 11.0                                                                           | 10.9       | 12.5       | 11.42      | 12.9       | 12.5       |
| C(Trt)     | 11.9                                                                           | 13.0       | 14.5       | 12.36      | 14.8       | 14.3       |
| K(Boc)     | 5.1                                                                            | 4.4        | 6.9        | 5.46       | 6.6        | 6.4        |
| W(Boc)     | 9.5                                                                            | 10.1       | 12.0       | 9.92       | 12.0       | 11.7       |
| E(tBu)     | 4.4                                                                            | 4.3        | 6.2        | 5.3        | 5.9        | 5.7        |
| Y(tBu)     | 6.2                                                                            | 6.5        | 8.4        | 6.25       | 8.3        | 7.6        |
| D(tBu)     | 3.6                                                                            | 3.9        | 5.2        | 4.2        | 5.7        | 4.8        |
| S(tBu)     | 2.8                                                                            | 2.7        | 4.6        | 2.8        | 4.5        | 3.6        |
| T(tBu)     | 3.4                                                                            | 3.6        | 5.4        | 3.9        | 5.1        | 5          |
| R(Pbf)     | 8.9                                                                            | 8.1        | 10.1       | 9.47       | 10.4       | 10.2       |

$\Delta t_{R(\text{pept-G})}$ : retention time of AA-peptide minus the retention time of Gly-peptide.

Supplementary Table S2. Hydrophobicity index for unprotected amino acids

| Amino acid | Hydrophobicity index (min) |            |            |            |            |            |
|------------|----------------------------|------------|------------|------------|------------|------------|
|            | Sequence 1                 | Sequence 2 | Sequence 3 | Sequence 4 | Sequence 5 | Sequence 6 |
| G          | 0.0                        | 0.0        | 0.0        | 0.0        | 0.0        | 0.0        |
| H          | -0.6                       | -2.4       | -1.0       | -0.3       | -0.3       | -0.3       |
| Q          | -0.1                       | -1.8       | -0.4       | 0.1        | 0.3        | 0.2        |
| N          | -0.1                       | -2.0       | -0.4       | 0.1        | -0.1       | 0.0        |
| C          | 0.7                        | -0.1       | 1.6        | 0.7        | 1.3        | 1.5        |
| K          | -0.9                       | -2.6       | -1.0       | -0.9       | -0.6       | -0.6       |
| W          | 4.1                        | 3.6        | 5.8        | 4.0        | 5.8        | 5.3        |
| E          | 0.0                        | -1.4       | 0.2        | -0.5       | 0.3        | 0.3        |
| Y          | 1.4                        | 0.5        | 2.2        | 1.1        | 2.0        | 1.8        |
| D          | -0.1                       | -1.4       | 0.0        | 0.0        | 0.0        | 0.0        |
| S          | -0.2                       | -1.9       | -0.3       | 0.9        | -0.1       | 0.0        |
| T          | 0.1                        | -1.4       | 0.2        | 0.1        | 0.3        | 0.2        |
| R          | -0.6                       | -2.4       | -0.6       | -0.8       | -0.5       | -0.5       |
| A          | -0.2                       | -1.4       | 0.5        | -0.4       | -0.2       | 0.0        |
| M          | 1.8                        | 0.8        | 2.9        | 2.0        | 2.9        | 3.4        |
| P          | 0.5                        | -0.7       | 1.2        | 0.3        | 0.9        | 0.8        |
| V          | 1.1                        | 0.5        | 2.6        | 1.3        | 2.2        | 2.1        |
| F          | 2.8                        | 3.2        | 5.2        | 3.2        | 4.9        | 4.6        |
| I          | 1.6                        | 1.9        | 4.2        | 1.5        | 2.6        | 2.0        |
| L          | 1.8                        | 2.2        | 4.5        | 2.2        | 3.9        | 4.6        |

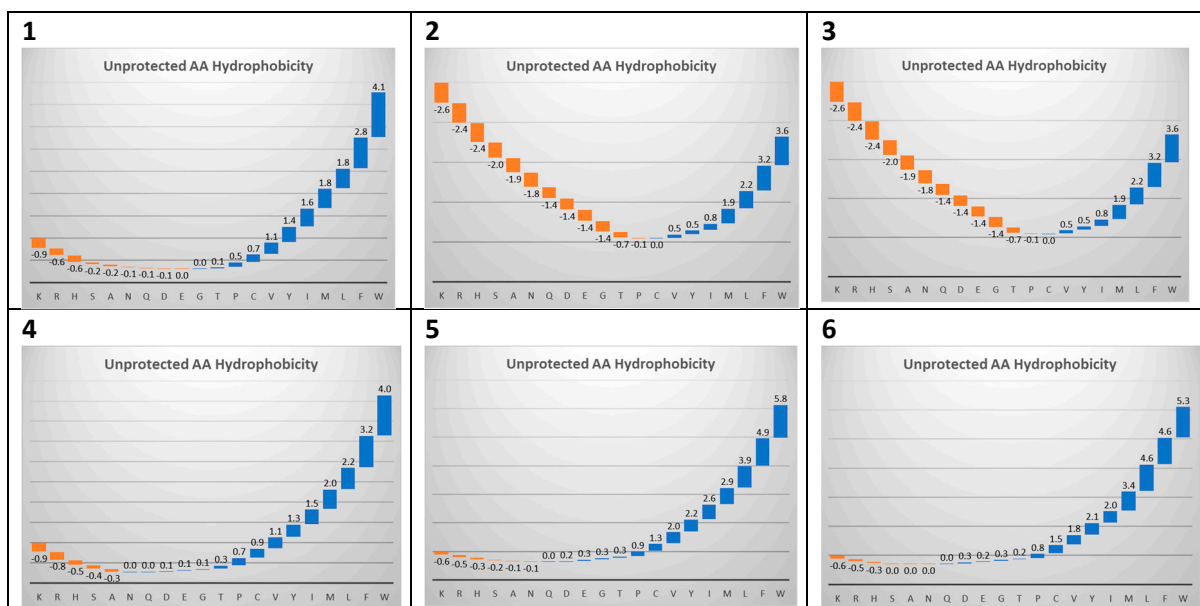

Supplemental Figure S1. Hydrophobicity index for the unprotected amino acids in different positions of the peptide chains. The figure number represents the sequence of the peptide as per Figure 1.

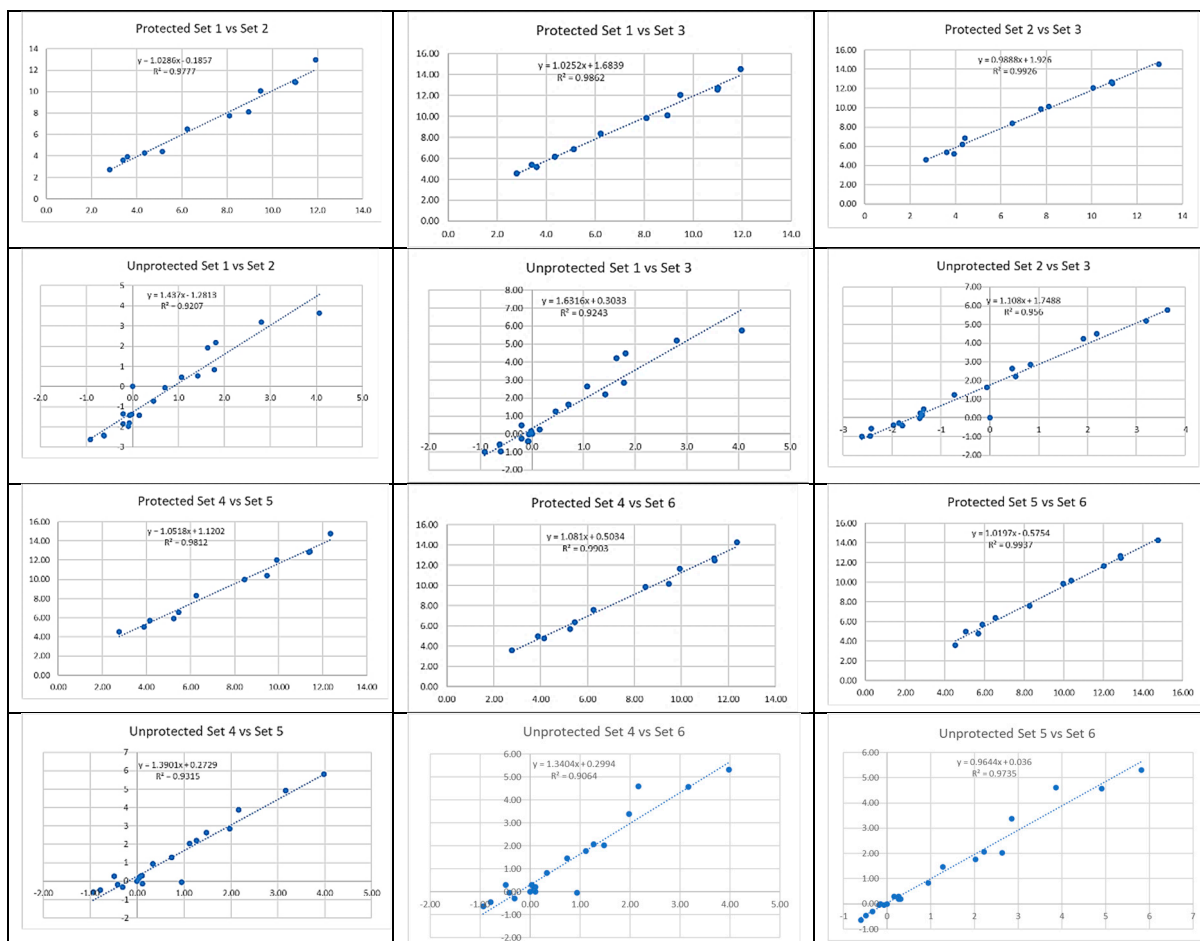

Supplemental Figure S2. Correlation among hydrophobicity indices for the protected and unprotected amino acids in different positions of the peptide chains.

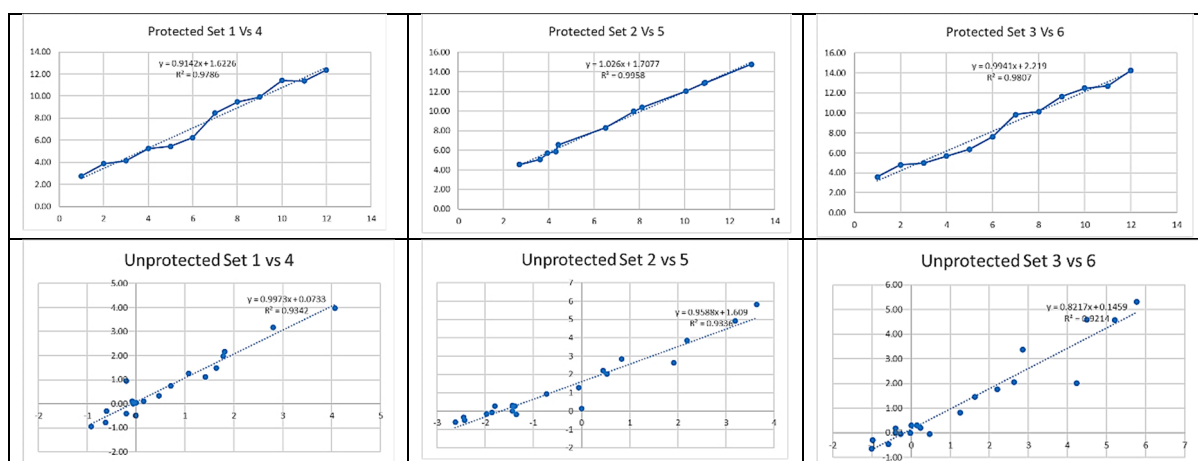

Supplemental Figure S3. Correlation among hydrophobicity indices for the protected and unprotected amino acids in acid and peptide amides.

Supplementary Table S3. Hydrophobicity index for Fmoc, Fmoc-amino acid.

| Amino acid | Fmoc group Hydrophobicity index (min)<br>$\Delta t_R$ (Fmoc-peptide – H-peptide) | Fmoc-amino acid Hydrophobicity index (min)<br>$\Delta t_R$ (Fmoc-peptide – H-Gly-peptide) |
|------------|----------------------------------------------------------------------------------|-------------------------------------------------------------------------------------------|
| H(Trt)     | 8.0                                                                              | 18.4                                                                                      |
| Q(Trt)     | 13.3                                                                             | 24.3                                                                                      |
| N(Trt)     | 13.5                                                                             | 24.5                                                                                      |
| C(Trt)     | 15.4                                                                             | 27.3                                                                                      |
| K(Boc)     | 13.8                                                                             | 18.9                                                                                      |
| W(Boc)     | 15.0                                                                             | 24.5                                                                                      |
| E(tBu)     | 15.0                                                                             | 19.4                                                                                      |
| Y(tBu)     | 15.1                                                                             | 21.4                                                                                      |
| D(tBu)     | 15.5                                                                             | 19.1                                                                                      |
| S(tBu)     | 15.9                                                                             | 18.7                                                                                      |
| T(tBu)     | 16.8                                                                             | 20.3                                                                                      |
| R(Pbf)     | 11.7                                                                             | 20.6                                                                                      |
| H          | 9.9                                                                              | 9.3                                                                                       |
| Q          | 12.0                                                                             | 11.8                                                                                      |
| N          | 12.2                                                                             | 12.0                                                                                      |
| C          | 15.1                                                                             | 15.8                                                                                      |
| K          | 10.3                                                                             | 9.4                                                                                       |
| W          | 13.8                                                                             | 17.9                                                                                      |
| E          | 12.8                                                                             | 12.8                                                                                      |
| Y          | 13.3                                                                             | 14.7                                                                                      |
| D          | 12.9                                                                             | 12.9                                                                                      |
| S          | 13.1                                                                             | 12.9                                                                                      |
| T          | 13.6                                                                             | 13.6                                                                                      |
| R          | 10.4                                                                             | 9.8                                                                                       |
| G          | 13.9                                                                             | 13.9                                                                                      |
| A          | 14.4                                                                             | 14.2                                                                                      |
| M          | 14.7                                                                             | 16.5                                                                                      |
| P          | 15.4                                                                             | 15.9                                                                                      |
| V          | 15.6                                                                             | 16.6                                                                                      |
| F          | 15.6                                                                             | 18.4                                                                                      |
| I          | 16.1                                                                             | 17.7                                                                                      |
| L          | 16.3                                                                             | 18.1                                                                                      |

Supplementary Table S4. Hydrophobicity index for Acetyl, Ac-amino acid.

| Amino acid | Acetyl group Hydrophobicity index (min)<br>$\Delta t_R$ (Ac-peptide – H-peptide) | Ac-amino acid Hydrophobicity index (min)<br>$\Delta t_R$ (Ac-peptide – H-G-peptide) |
|------------|----------------------------------------------------------------------------------|-------------------------------------------------------------------------------------|
| H(Trt)     | 1.1                                                                              | 0.8                                                                                 |
| Q(Trt)     | 1.2                                                                              | 0.8                                                                                 |
| N(Trt)     | 1.6                                                                              | 2.4                                                                                 |
| C(Trt)     | 1.5                                                                              | 1.5                                                                                 |
| K(Boc)     | 1.2                                                                              | 0.2                                                                                 |
| W(Boc)     | 1.2                                                                              | 1.3                                                                                 |
| E(tBu)     | 1.3                                                                              | 1.4                                                                                 |
| Y(tBu)     | 1.2                                                                              | 2.7                                                                                 |
| D(tBu)     | 1.5                                                                              | 1.0                                                                                 |
| S(tBu)     | 1.6                                                                              | 1.6                                                                                 |
| T(tBu)     | 1.8                                                                              | 2.0                                                                                 |
| R(Pbf)     | 1.1                                                                              | 0.3                                                                                 |
| H          | 2.1                                                                              | 3.4                                                                                 |
| Q          | 2.7                                                                              | 3.0                                                                                 |
| N          | 2.5                                                                              | 8.0                                                                                 |
| C          | 3.3                                                                              | 5.2                                                                                 |
| K          | 2.2                                                                              | 11.7                                                                                |
| W          | 3.5                                                                              | 9.7                                                                                 |
| E          | 3.1                                                                              | 5.8                                                                                 |
| Y          | 3.4                                                                              | 6.5                                                                                 |
| D          | 2.9                                                                              | 4.4                                                                                 |
| S          | 2.8                                                                              | 4.0                                                                                 |
| T          | 3.2                                                                              | 7.2                                                                                 |
| R          | 2.0                                                                              | 10.5                                                                                |
| G          | 3.0                                                                              | 7.1                                                                                 |
| A          | 3.3                                                                              | 14.7                                                                                |
| M          | 3.4                                                                              | 14.8                                                                                |
| P          | 3.4                                                                              | 7.3                                                                                 |
| V          | 3.4                                                                              | 5.6                                                                                 |
| F          | 4.7                                                                              | 6.8                                                                                 |
| I          | 4.3                                                                              | 14.2                                                                                |
| L          | 5.1                                                                              | 17.5                                                                                |

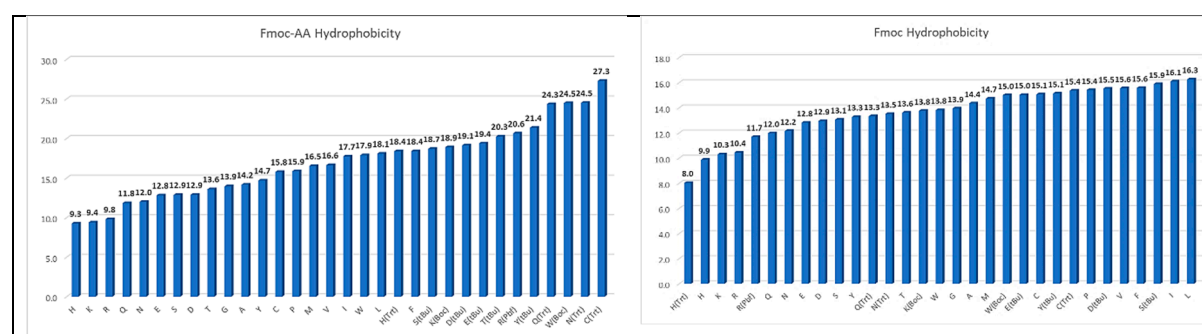

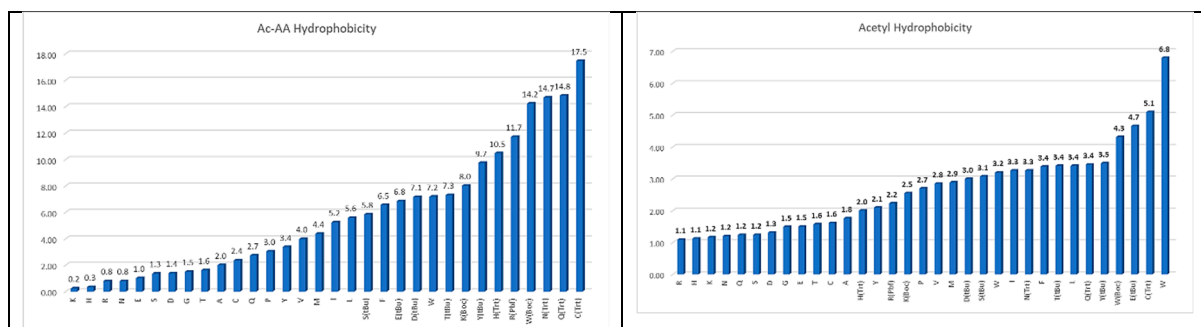

Supplemental Figure S4. Hydrophobicity indices for: Fmoc-amino acid (protected and unprotected), Fmoc protecting group, Ac-amino acid (protected and unprotected), and Acetyl group.
